# Supplementary material
Source: PubMed Central journal article supplement (PMC4304567)

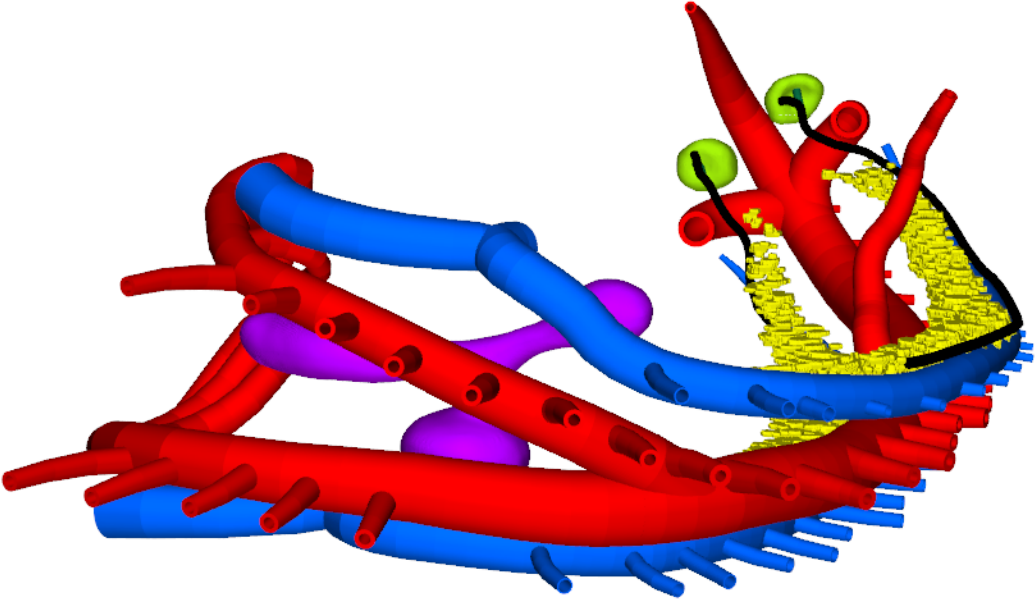

Supplement: joa0226-0113-sd2.pdf [file joa0226-0113-sd2.pdf]

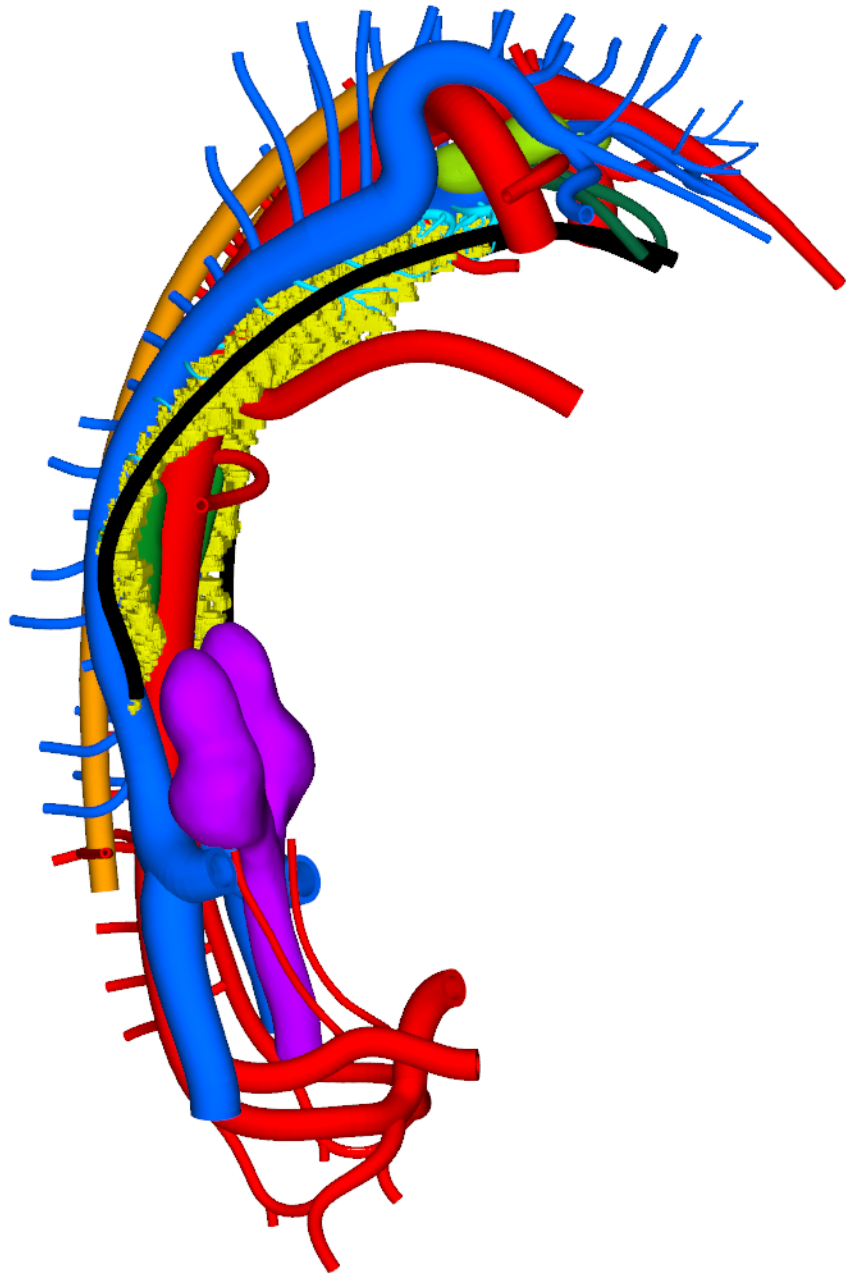

Supplement: joa0226-0113-sd3.pdf [file joa0226-0113-sd3.pdf]

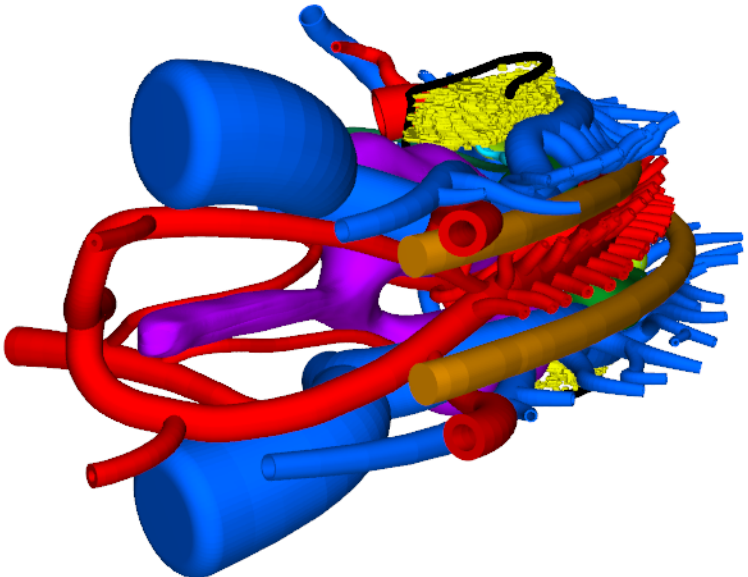

Supplement: joa0226-0113-sd4.pdf [file joa0226-0113-sd4.pdf]

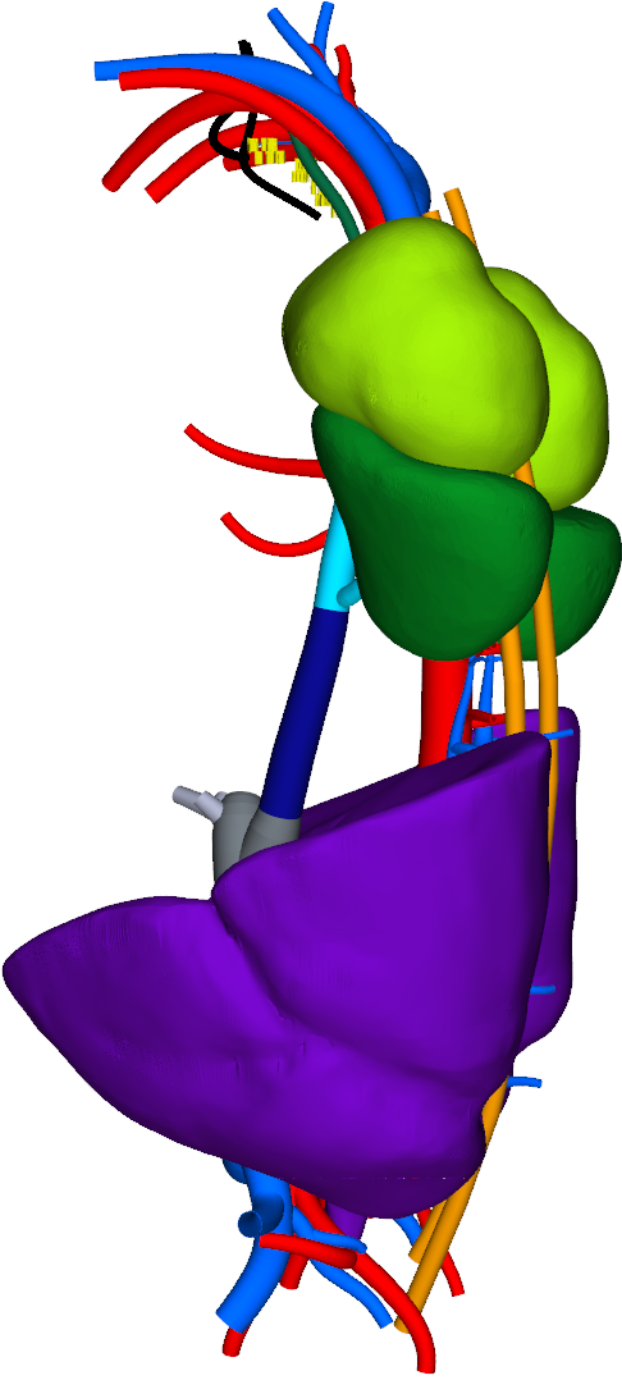

Supplement: joa0226-0113-sd5.pdf [file joa0226-0113-sd5.pdf]

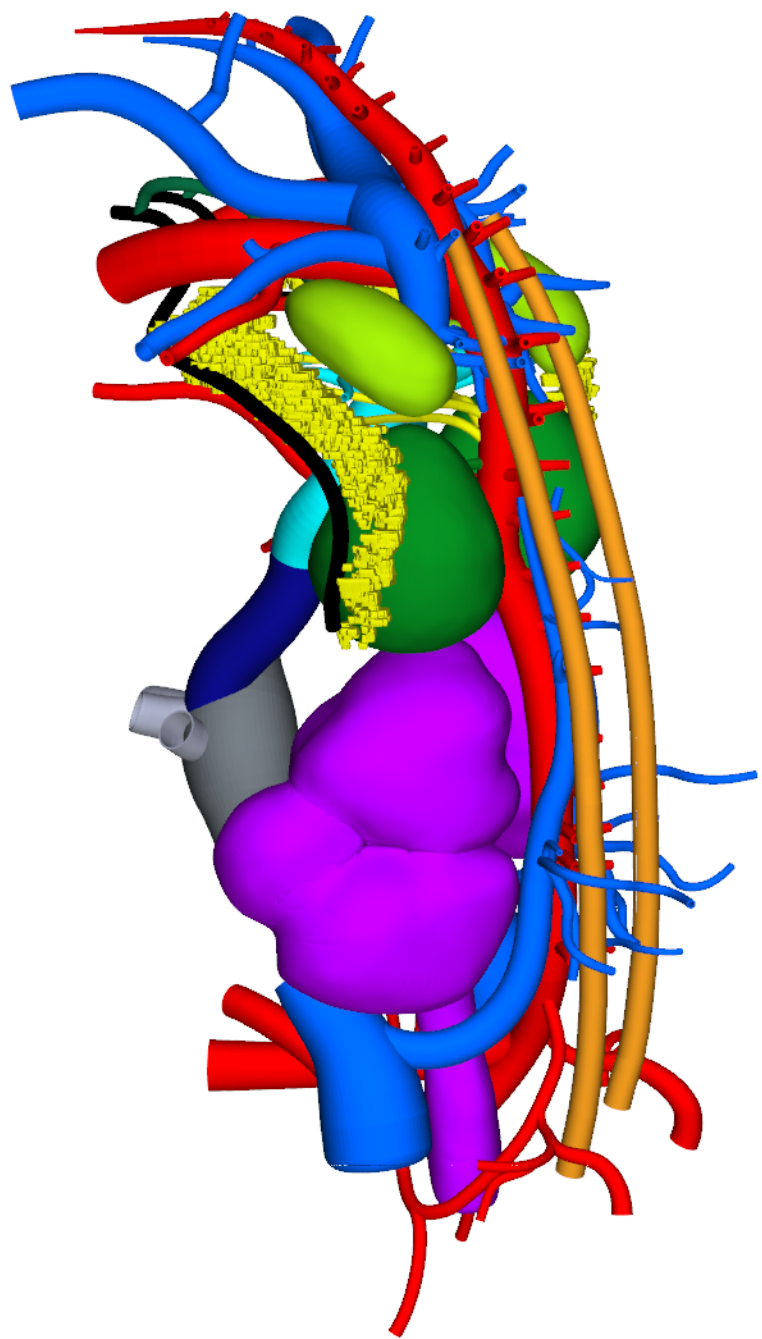

Supplement: joa0226-0113-sd6.pdf [file joa0226-0113-sd6.pdf]
